# Supplementary material for: Population turnover facilitates cultural selection for efficiency
Source: Research Square preprint supplement (doi:10.21203/rs.3.rs-88894/v1), 2020-10-12
Supplement: Supplementary file 1 [file a61afc31e50747269c556b31.pdf]

# Demographic turnover facilitates cultural selection for efficiency

Michael Chimento<sup>\*1,2</sup>, Gustavo Alarcón-Nieto<sup>1</sup>, and Lucy Aplin<sup>1,2</sup>

<sup>1</sup>*Cognitive and Cultural Ecology Lab, Max Planck Institute of Animal Behavior; Am Obstberg 1, 78315 Radolfzell, Germany*

<sup>2</sup>*Centre for the Advanced Study of Collective Behaviour, Konstanz University; Universitätsstraße 10, 78464 Konstanz, Germany*

October 6, 2020

## Data and analysis

The repository for this manuscript is located at [www.github.com/michaelchimento/DemographicTurnoverEfficiency](https://www.github.com/michaelchimento/DemographicTurnoverEfficiency).

The repository contains 3 folders. In the analysis folder, there is all of the R code necessary to re-run the statistical analyses presented in the text. The data folder contains the data set of solution behaviors for the experiment, the data set of latency to learn for each bird, and the data set of output from the agent based model. The ABM folder contains the code for the agent based model, written for Python 3.x.

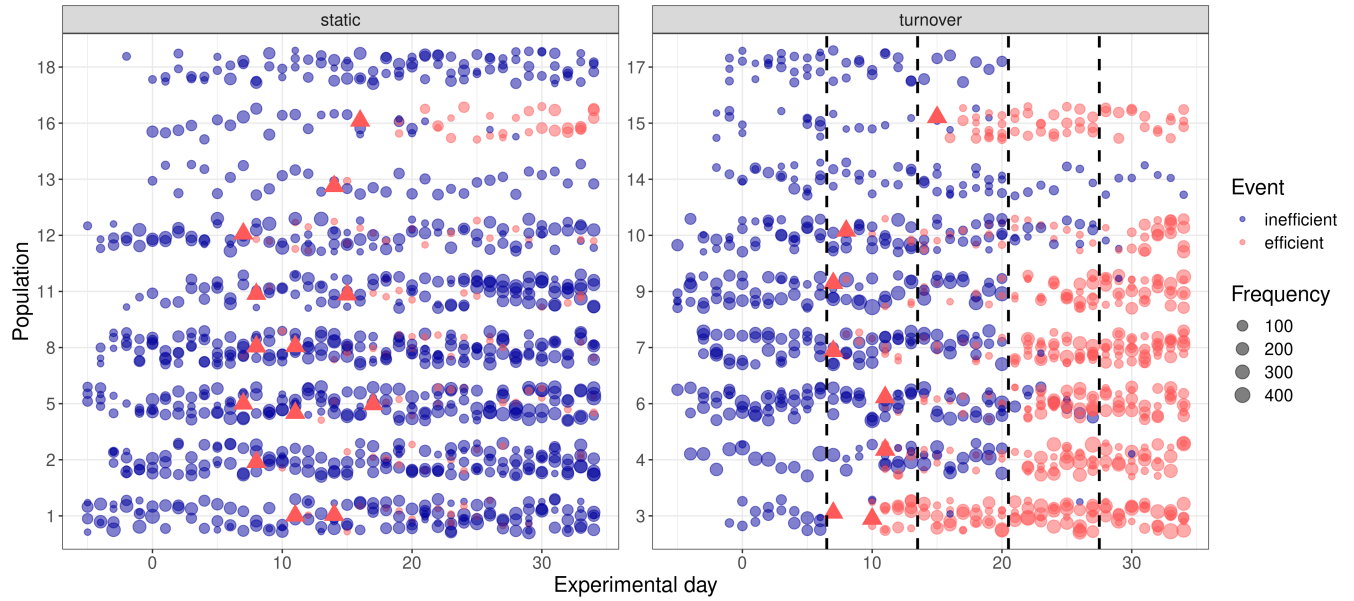

Figure 1: Overview of solution frequency data from all populations over experimental days, faceted by condition. Each colored circle represents the productions produced by one bird in a given day (red: efficient, blue: inefficient), and innovation events are marked with a large triangle. Of interest is 1) in the static condition, the many innovations without selection for the efficient solution and 2) in the turnover condition, the latency between innovation and selection for the efficient behavior. Innovations were widely made by experienced solvers, who then produced the efficient in low frequency, but did not adopt them. Rather, incoming naive birds adopted the efficient solution in the turnover condition, driving cultural selection.

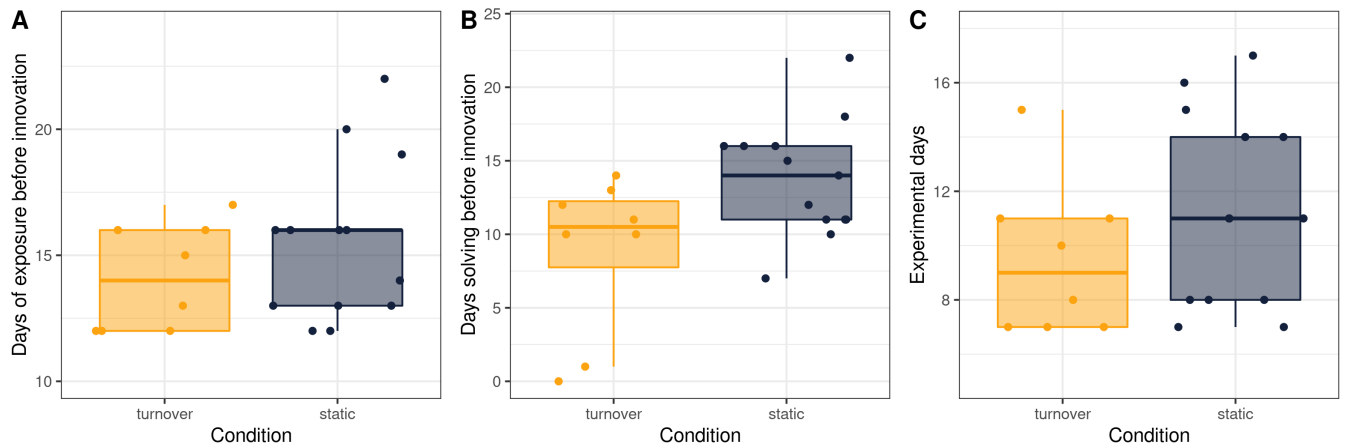

Figure 2: Comparison of innovation timing between conditions (static: dark blue, turnover: yellow). Both days exposure to the task before innovation and experimental day were not found to be significantly lower in the static condition. Days solving before innovation was significantly lower, however note the two data points that drove this difference. From this data, it seems like difference in innovation between conditions was not primarily responsible for the strong selection for efficiency in the turnover condition.

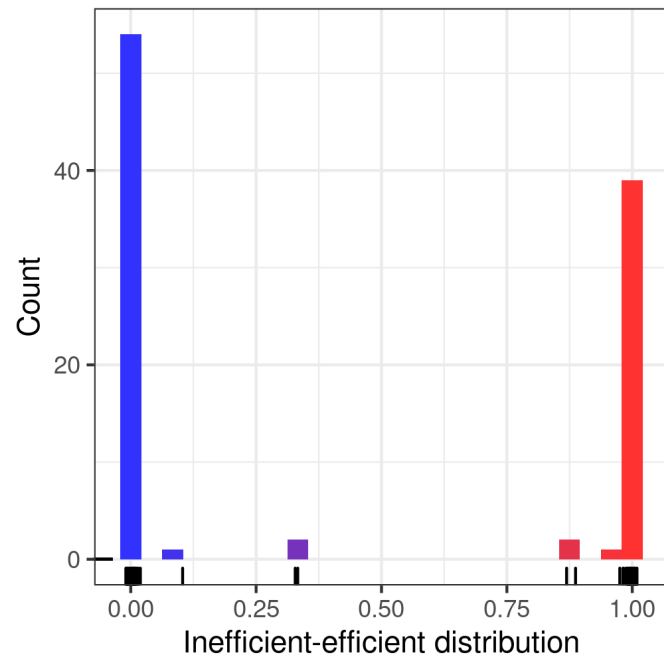

Figure 3: Proportions of solution types produced by each solver bird (count on y axis). A value of 0 indicates an individual that only produces inefficient solutions, 1 indicates an individual that only produces efficient solutions.

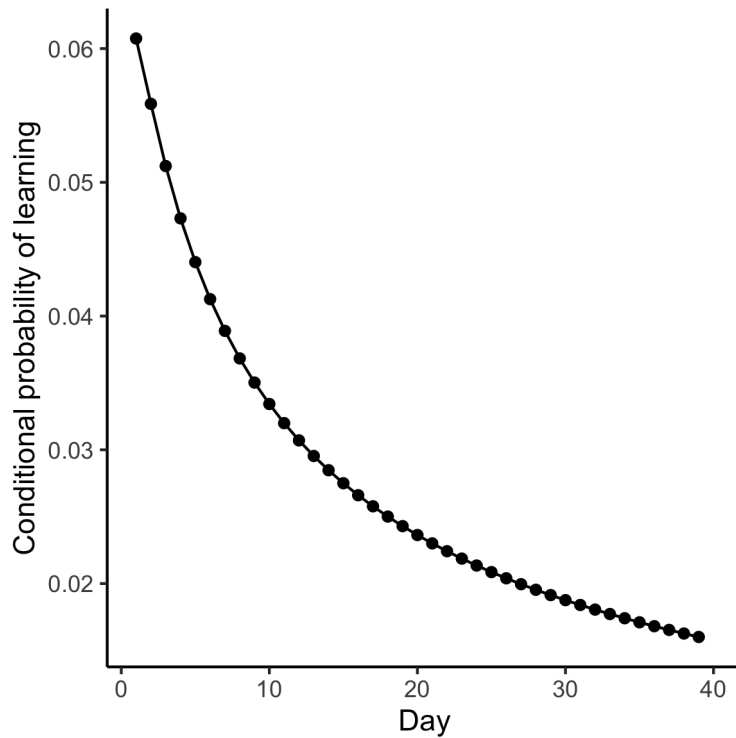

Figure 4: The conditional probability of learning was estimated from a log-normal parametric survival analysis of latency-to-first-solve data. Within an individual bird, they were more likely to socially learn soon after exposure to the puzzle, and this probability decreased over time. This function was used to inform the transition from naive to knowledgeable states in the agent based model.

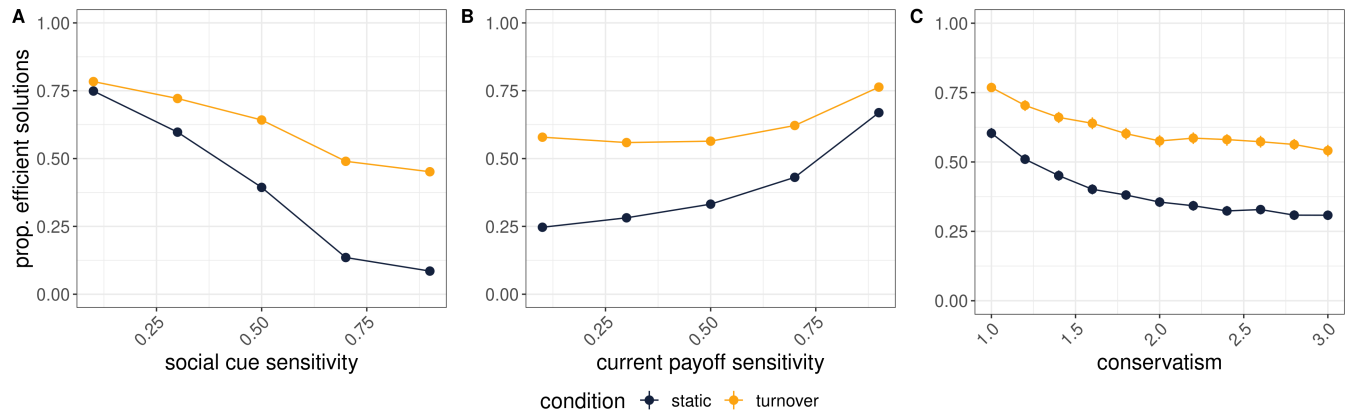

Figure 5: Proportion of efficient solutions at final time step with a reversed conditional probability of learning. Results only differ slightly compared to the model run with experimental data, showing that the effect of turnover should be robust to various real-world contexts in which this learning function may vary.)

Table 1: LMM: Individual improvements with experience

|                     | Dependent variable:    |
|---------------------|------------------------|
|                     | $\log(\text{TTS} + 1)$ |
| age (adult)         | −0.169*<br>(0.091)     |
| sex (male)          | 0.014<br>(0.082)       |
| scaled(trial)       | −0.051***<br>(0.002)   |
| intercept           | 0.810***<br>(0.246)    |
| Observations        | 113,134                |
| Log Likelihood      | −93,146.270            |
| Akaike Inf. Crit.   | 186,310.500            |
| Bayesian Inf. Crit. | 186,397.300            |

Note: \* $p < 0.1$ ; \*\* $p < 0.05$ ; \*\*\* $p < 0.01$

Table 1: LMM used to determine whether birds were improving their performance with experience, quantified as the  $\log(\text{TTS} + 1)$  to account for non-normality (0 seconds was the shortest recorded TTS). Predictors include age (juvenile as reference), sex (female as reference), a z-scaled trial number (0 as the mean trial for a given bird, values as standard deviations), and random effects of solution type, and nested random effects of ID within population within year. Results indicate that birds reduced their TTS by about 5% by the time they produced 1 standard deviation's worth of solutions of either type. Older birds improved slightly more, and sex did not significantly affect this improvement.

Table 2: GLMM: Selection for efficient solution between conditions

|                                       | <i>Dependent variable:</i> |
|---------------------------------------|----------------------------|
|                                       | efficient solution         |
| age (adult)                           | −1.920***<br>(0.079)       |
| sex (male)                            | −1.582***<br>(0.069)       |
| experimental day                      | 0.291***<br>(0.010)        |
| condition (turnover)                  | −2.169<br>(1.700)          |
| experimental day:condition (turnover) | 0.603***<br>(0.016)        |
| intercept                             | −10.853***<br>(1.088)      |
| Observations                          | 141,059                    |
| Log Likelihood                        | −5,741.569                 |
| Akaike Inf. Crit.                     | 11,499.140                 |
| Bayesian Inf. Crit.                   | 11,577.990                 |

Note:

\* $p < 0.1$ ; \*\* $p < 0.05$ ; \*\*\* $p < 0.01$

Table 2: Logistic GLMM used to determine whether populations were selecting for the efficient solution. The response variable was the solution type (efficient: 1, inefficient: 0) Predictors include age (juvenile as reference), sex (female as reference), and an interaction between experimental day and condition (static as reference). Data was subset to after T1, when both solutions were available. Random effects included population nested within year. Solution type was not included as a random effect, since this variable was highly co-linear with condition, and would result in a failed convergence. Additionally, ID was not included as a random effect, since in turnover populations most birds were not in the experiment on the day represented by the intercept. The significant interaction between experimental day and turnover indicates that birds in the turnover condition were significantly more likely to produce the efficient solution as the experiment progressed.

Table 3: LMM: improvement over course of experiment by condition

|                                       | <i>Dependent variable:</i> |
|---------------------------------------|----------------------------|
|                                       | log(TTS + 1)               |
| sex (male)                            | 0.002<br>(0.004)           |
| age (adult)                           | −0.158***<br>(0.004)       |
| experimental day                      | −0.0004*<br>(0.0002)       |
| condition (turnover)                  | 0.098<br>(0.098)           |
| experimental day:condition (turnover) | −0.004***<br>(0.0003)      |
| intercept                             | 0.750***<br>(0.159)        |
| Observations                          | 113,145                    |
| Log Likelihood                        | −100,226.500               |
| Akaike Inf. Crit.                     | 200,471.000                |
| Bayesian Inf. Crit.                   | 200,557.700                |

Note:

\*p<0.1; \*\*p<0.05; \*\*\*p<0.01

Table 3: LMM used to determine whether populations were improving over experimental time, with performance quantified as the log(TTS + 1) to account for non-normality (0 seconds was the shortest recorded TTS). Predictors include age (juvenile as reference), sex (female as reference), and an interaction between experimental day and condition (static as reference). Random effects included population nested within year. Solution type was not included as a random effect, since this variable was highly co-linear with condition, and would result in a failed convergence. Additionally, ID was not included as a random effect, since in turnover populations most birds were not in the experiment on the day represented by the intercept. Results indicate that both conditions improved over experimental time, however the turnover condition improved more than static condition.

Table 4: GLMM: Predictors of failure to adopt efficient solution

|                               | <i>Dependent variable:</i> |
|-------------------------------|----------------------------|
|                               | failure to adopt           |
| days experience               | 0.364***<br>(0.132)        |
| socially observed inefficient | 0.485<br>(2.062)           |
| intercept                     | −3.421*<br>(1.977)         |
| Observations                  | 53                         |
| Log Likelihood                | −18.481                    |
| Akaike Inf. Crit.             | 46.962                     |
| Bayesian Inf. Crit.           | 56.813                     |

*Note:* \* $p < 0.1$ ; \*\* $p < 0.05$ ; \*\*\* $p < 0.01$

Table 4: Logistic GLMM used to determine what predicted the failure to adopt the efficient solution after sampling it. The response variable was failure to adopt, which was calculated by measuring the majority solution of the last 10% of solves produced by an individual bird. Predictors include experience (days spent producing the inefficient solution prior to sampling the efficient solution), as well as conformity (the proportion of socially observed inefficient solutions on the day the bird first produced the efficient solution). Age and sex did not significantly predict the failure to switch, and thus were excluded from the final model. Only days experience significantly predicted whether or not the birds failed to switch, indicating that experience and not conformity was responsible for behavioral conservatism in these birds.

Table 5: Innovators table

|    | condition | population | ID    | age | sex | time of innovation  | hours_since_last_efficient_soln |
|----|-----------|------------|-------|-----|-----|---------------------|---------------------------------|
| 1  | static    | 1          | E0DEE | 6   | F   | 2020-02-10 09:10:23 | NA                              |
| 2  | static    | 1          | DE3CE | 5   | F   | 2020-02-13 13:36:11 | 61                              |
| 3  | static    | 2          | E04AD | 5   | F   | 2020-02-07 14:56:37 | NA                              |
| 4  | static    | 5          | E289E | 6   | F   | 2020-02-06 12:56:07 | NA                              |
| 5  | static    | 5          | DBD48 | 6   | M   | 2020-02-10 15:55:04 | 99                              |
| 6  | static    | 5          | DEF48 | 6   | M   | 2020-02-16 14:16:25 | 73                              |
| 7  | static    | 8          | D9831 | 5   | M   | 2020-02-07 15:09:18 | NA                              |
| 8  | static    | 8          | DACDC | 5   | F   | 2020-02-10 15:57:46 | 73                              |
| 9  | static    | 11         | DDFAA | 6   | F   | 2020-02-07 16:34:25 | NA                              |
| 10 | static    | 11         | DB4AC | 6   | F   | 2020-02-14 14:10:58 | 147                             |
| 11 | static    | 12         | E2BAC | 5   | M   | 2020-02-06 17:20:29 | NA                              |
| 12 | static    | 13         | 77F08 | 6   | M   | 2019-02-20 15:24:17 | NA                              |
| 13 | static    | 16         | 76C9C | 6   | M   | 2019-02-22 16:14:56 | NA                              |
| 14 | turnover  | 3          | DE875 | 6   | F   | 2020-02-06 10:15:19 | NA                              |
| 15 | turnover  | 3          | DBB1F | 5   | F   | 2020-02-09 17:20:09 | 79                              |
| 16 | turnover  | 4          | DEF9B | 5   | F   | 2020-02-10 08:29:51 | NA                              |
| 17 | turnover  | 6          | E11CB | 5   | M   | 2020-02-10 08:54:54 | NA                              |
| 18 | turnover  | 7          | DBC10 | 6   | M   | 2020-02-06 10:22:42 | NA                              |
| 19 | turnover  | 9          | D8CB2 | 5   | M   | 2020-02-06 10:25:29 | NA                              |
| 20 | turnover  | 10         | E1168 | 6   | M   | 2020-02-07 15:05:19 | NA                              |
| 21 | turnover  | 15         | 76928 | 5   | M   | 2019-02-14 16:44:41 | NA                              |

Table 5: Table of innovation events, here defined as either the first time the efficient solution was produced by a bird in a population, or the first production within the outliers of the distribution of time-differences between prior production of efficient solution ( $\geq 61$  hours). NA values are when the innovator was the first to produce the efficient solution in its population.

Table 6: Solution type table

| condition | solution type | mean(TTS) | sd(TTS) | included | total solves | excluded(NA TTS) | TTS > 60 sec. |
|-----------|---------------|-----------|---------|----------|--------------|------------------|---------------|
| static    | efficient     | 1.2       | 2.14    | 1489     | 1592         | 103              | 0             |
| static    | inefficient   | 1.73      | 2.85    | 81888    | 88829        | 6941             | 12            |
| turnover  | efficient     | 1.52      | 2.68    | 33838    | 39813        | 5975             | 4             |
| turnover  | inefficient   | 2.57      | 11.81   | 39256    | 44685        | 5429             | 39            |

Table 6: Summary of TTS by condition and type, along with observations included, and excluded for either an unrecorded TTS or an exceptionally long TTS.
